# Supplementary material for: MMP9-Associated Tumor Stem Cells, CCL1-Silenced Dendritic Cells, and Cytokine-Induced Killer Cells Have a Remarkable Therapeutic Efficacy for Acute Myeloid Leukemia by Activating T Cells
Source: Hindawi journal article supplement (doi:10.1155/2023/2490943), 2023-05-09

MMP9 Expression

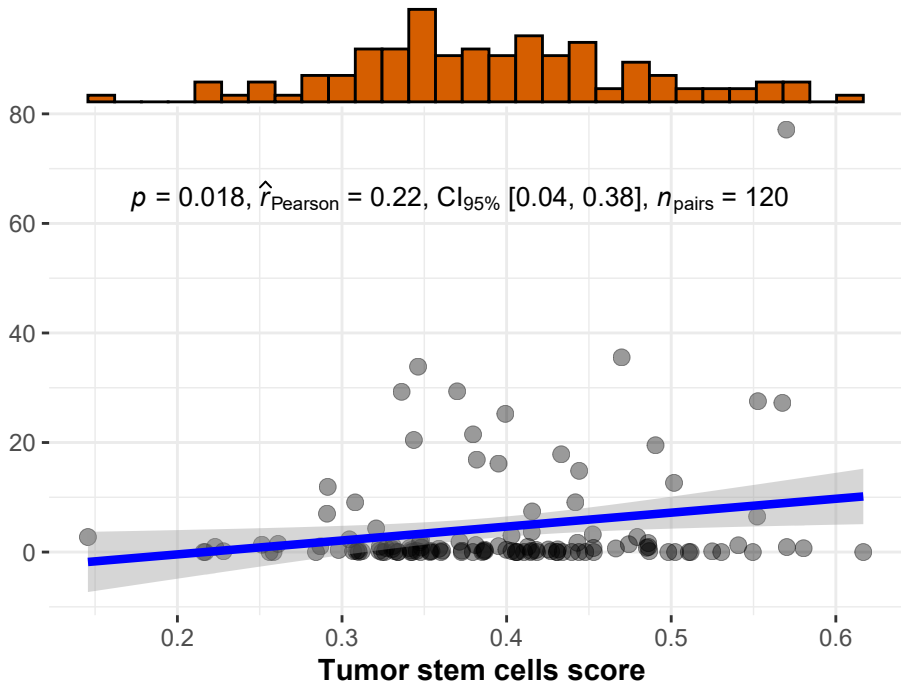

Supplement: f2 [file 2490943.f2.pdf]
